# Supplementary material for: Maternal inheritance of F1 hybrid morphology and colony shape in the coral genus Acropora
Source: PeerJ. 2019 Feb 19;7:e6429. doi: 10.7717/peerj.6429 (PMC6385702; doi:10.7717/peerj.6429)
Supplement: Supplemental Information 4 — (A) A. intermedia. (B) A. florida. (C) FLOint F1 hybrid. (D) INTflo F1 hybrid. (E) A putative F1 hybrid. [file peerj-07-6429-s004.xlsx]

## Sheet: all data
Row data of morphological characters
Data1	Acropora intermedia
		colony ID	Width of colony	Length of colony	Diameter of axial corallite	Branch length	Branching number
	4-year-old purebrd	28	117.77	79.27	3.33	94.23	6
					3.18	75.15	6
					3.23	53.47	0
		32	54.52	78.74	2.18	82.25	6
					2.1	43.26	0
		30	53.77	79.8	3.1	88.51	7
					2.25	56.96	0
					1.59	11.46	0
		23	36.02	38.83	2.41	58.45	6
		22	78.12	62.19	2.22	75.98	2
					1.8	36.25	0
					1.81	14.79	0
		21	140.48	73.31	3.06	95.75	3
					3.31	84.41	4
					2.63	67.8	2
		33	72.74	45.59	2.07	42.53	0
					2.18	40.59	0
					2.07	30.66	0
		31	68.96	46.95	3.13	64.15	5
					2.2	49.49	0
					2.07	28.04	0
		29	42.54	57.9	2.9	59.98	1
					2.42	42.51	0
		27	40.65	57.28	2.67	56.52	7
					3.04	45.52	0
	7-year-old purebrd	i9	n.d.	n.d.	n.d.	143*	9
					n.d.	157*	7
	wild colony	i25	n.d.	n.d.	3.68	147.65	5
		i18	n.d.	n.d.	4.11	108.03	9
		i21	n.d.	n.d.	3.74	110.56	4
		i10	n.d.	n.d.	2.86	144.79	5
		i24	n.d.	n.d.	3.99	135.04	7
		i35	n.d.	n.d.	3.79	223.66	4
							* data obtained from photos
Data 2	Acropora florida
		colony ID	Width of colony	Length of colony	Diameter of axial corallite	Branch length	Branching number
	4-year-old purebrd	3	15.85	21.91	2.38	21.82	4
		2	26.83	37.15	2.52	29.87	9
		6	30.14	31.02	2.32	28.08	4
					2	13.21	0
					2.2	10.47	0
		5	47.09	44.68	3	45.17	12
					3.18	24.35	4
					2.82	32.46	12
		4	31.3	27.41	2.41	21.49	3
					2.33	21.59	1
					2.24	20.78	3
		11	44.29	37.5	2.5	27.24	8
					2.89	22.85	10
					2.33	17.63	6
		9	23.78	26.334	2.23	25.56	8
					2.18	13.74	0
					2.02	12.14	0
		8	41.94	28.72	2.46	30.24	9
					2.52	28.29	2
					2.55	15.01	1
		7	52.83	41.24	2.75	27.09	5
					2.53	24.82	4
					2.3	26.17	5
		12	40.97	33.33	2.83	28.91	10
					2.39	20.6	2
					2.62	18.01	1
	7-year-old purebrd	f11	n.d.	n.d.	3.28	180.21	65
	wild colony	f1	n.d.	n.d.	3.49	162.47	57
		f13	n.d.	n.d.	3.53	176.17	67
		f23	n.d.	n.d.	3.1	126.7	44
		f15	n.d.	n.d.	3.26	162.38	70
Data 3	FLOint F1 hybrid (A. florida eggs x A. intermedia sperm)
		colony ID	Width of colony	Length of colony	Diameter of axial corallite	Branch length	Branching number
	4-year-old F1 hybrid	42	59.35	53.62	2.15	69.55	13
					2.33	51.41	7
					1.99	41.38	2
		45	67.97	77.25	2.81	46.73	11
					2.65	42.38	11
					2.74	51.79	17
		47	48.41	43.19	2.41	34.3	4
					2.31	28.84	1
					2.1	24.67	2
		43	29.47	23.12	2.94	20.88	3
					2.75	21.47	1
					2.5	19.68	2
		50	27.25	10.6	2.37	15.9	3
		48	39.46	26.33	2.88	21.12	2
					1.98	18.83	2
					1.91	15.16	0
		41	43.81	34.79	2.1	31.47	7
					2.03	19.33	2
					1.86	18.84	2
		49	27.92	21.03	2.29	23.01	0
					2.41	14.8	0
		44	91.03	79.93	2.75	50.7	13
					2.52	56.08	16
					2.6	52.52	16
		46	59.74	43.51	2.42	40.98	13
					2.7	37.79	7
					2.55	32.79	8
	8-year-old F1 hybrid	FLOint B1	n.d.	n.d.	3.38	153.05	42
	9-year-old F1 hybrid				3.37	107.32	30
					3.07	120.02	28
Data 4	INTflo F1 hybrid (A. intermedia eggs x A. florida sperm)
		colony ID	Width of colony	Length of colony	Diameter of axial corallite	Branch length	Branching number
	4-year-old F1 hybrid	60	26.54	13.56	2	12.64	0
					1.9	11.65	0
		59	27.61	20.77	2.13	15.25	2
					2.01	10.64	0
		58	28.68	28.19	2.32	24.89	2
					2.27	22.19	1
					2.08	19.63	0
		57	42.1	32.3	2.31	29.4	3
					2.43	25.88	2
					2.31	10.57	1
		56	40.64	17.18	2.38	22.54	2
					2.35	17.56	0
		52	62.54	46.8	3.16	66.05	14
					2.99	58.87	7
					2.23	25.53	0
		51	60.88	51.49	3.12	44.29	8
					3.07	58.62	8
					2.75	42.08	5
		53	65.17	46.32	3.25	36.94	2
					3.03	33.73	3
					3.05	44.19	8
		54	95.56	67.86	3.17	96.07	33
					2.45	54.37	4
		55	26.45	21.85	1.7	25.63	3
					2.18	17.35	2
	8-year-old F1 hybrid	INTflo A1	n.d.	n.d.	n.d.	180*	25
					n.d.	160*	23
	9-year-old F1 hybrid				2.84	93.95	23
							* data obtained from photos
Data 5	Putative F1 hybrid ("int-flo")
		colony ID	Width of colony	Length of colony	Diameter of axial corallite	Branch length	Branching number
	collected in 2015	int-flo	n.d.	n.d.	3.28	106.72	17
	collected in 2012				3.17	137.74	32
